# Supplementary material for: Assessing the Vertical Displacement of the Grand Ethiopian Renaissance Dam during its Filling using DInSAR technology and its Potential Acute Consequences on the Downstream Countries
Source: Preprints.org preprint supplement (doi:10.20944/preprints202109.0408.v1), 2021-09-23
Supplement: Supplementary file 2 [file supplementary]

Archive with 2 entries (2 files):
- with track changes/remotesensing-1352485_Track_Changes_final.docx
- with track changes/remotesensing-1352485_Track_Changes_final.pdf
